# Supplementary material
Source: PubMed Central journal article supplement (PMC8140400)
Supplement: NIHMS1703252-supplement-Supplementary_information.pdf [file NIHMS1703252-supplement-Supplementary_information.pdf]

**Fully automated sample processing and analysis workflow for low-input proteome  
profiling**

*Yiran Liang<sup>1</sup>, Hayden Acor<sup>1</sup>, Michaela A. McCown<sup>2</sup>, Andikan J. Nwosu<sup>1</sup>, Hannah Boekweg,<sup>2</sup>  
Nathaniel B. Axtell<sup>1</sup>, Thy Truong<sup>1</sup>, Yongzheng Cong<sup>1</sup>, Samuel H. Payne<sup>2</sup>, Ryan T. Kelly<sup>1\*</sup>*

1. Department of Chemistry and Biochemistry, Brigham Young University, Provo, UT, 84602

2. Department of Biology, Brigham Young University, Provo, UT, 84602

\* Email: [ryan.kelly@byu.edu](mailto:ryan.kelly@byu.edu)

Supporting information

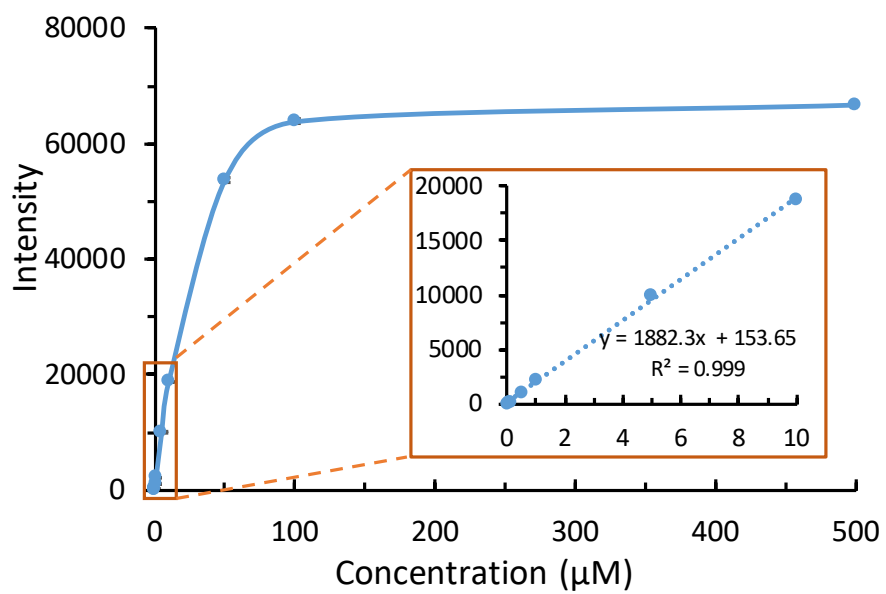

Figure S1: Calibration curve for 10 µL fluorescein samples using Synergy H4 Hybrid plate reader.  $R^2 = 0.999$  for 0–10 µM.

## Supporting information

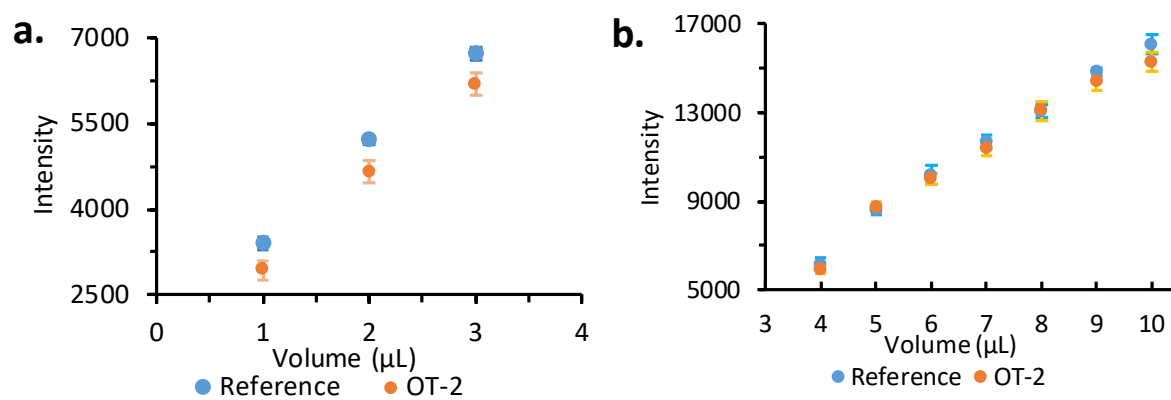

Figure S2: Accuracy and reproducibility of OT-2 pipetting compared with manual pipetting: (a) 1–3 µL, (b) 4–10 µL. Error bars represent  $\pm 1$  standard deviation for 12 replicates. Corresponding data are shown in Table S1.

## Supporting information

Table S1: Reproducibility and accuracy of OT-2 robot pipetting from 1 to 10  $\mu\text{L}$ . For accuracy, the manual pipetting was treated as the reference (100%). 12 replicates were obtained for each volume. This result is similar with the manufacturer specifications. <sup>1</sup>

| Volume ( $\mu\text{L}$ ) |        | 10   | 9    | 8     | 7    | 6    | 5   | 4    | 3    | 2    | 1    |
|--------------------------|--------|------|------|-------|------|------|-----|------|------|------|------|
| CV (%)                   | Manual | 2.6  | 1.2  | 2.1   | 2.8  | 4.3  | 2.0 | 4.4  |      |      |      |
|                          | OT-2   | 2.8  | 2.8  | 3.2   | 3.3  | 2.8  | 2.4 | 2.3  | 3.3  | 4.3  | 5.6  |
| Accuracy (%)             | OT-2   | 95.1 | 97.4 | 100.3 | 98.1 | 98.3 | 102 | 95.7 | 92.1 | 89.3 | 85.9 |

## Supporting information

Table S2: The effect of pipetting speed and changing tips. 10  $\mu\text{L}$  of 10  $\mu\text{M}$  NaFl was used as sample.

|            |                  | Intensity |       |        |              |
|------------|------------------|-----------|-------|--------|--------------|
|            | Pipetting speed* | Average   | STDEV | CV (%) | Accuracy (%) |
| Single tip | Slow             | 17699     | 703   | 4.0    | 101.8        |
|            | Fast             | 17405     | 277   | 1.6    | 100.1        |
|            | Manual           | 17385     | 195   | 1.1    |              |
| Change tip | Slow             | 17002     | 366   | 2.1    | 97.8         |
|            | Fast             | 16762     | 450   | 2.7    | 96.4         |

“Single tip”: all the replicates were pipetted using only one tip.

“Change tip”: change pipette tip for every replicate.

“Slow”: the flowrate of aspirating and dispensing were set as 50  $\mu\text{L}/\text{s}$ .

“Fast”: default setting was used. The flowrate of aspirating was 150  $\mu\text{L}/\text{s}$  and the flowrate of dispensing was 300  $\mu\text{L}/\text{s}$ .

Supporting information

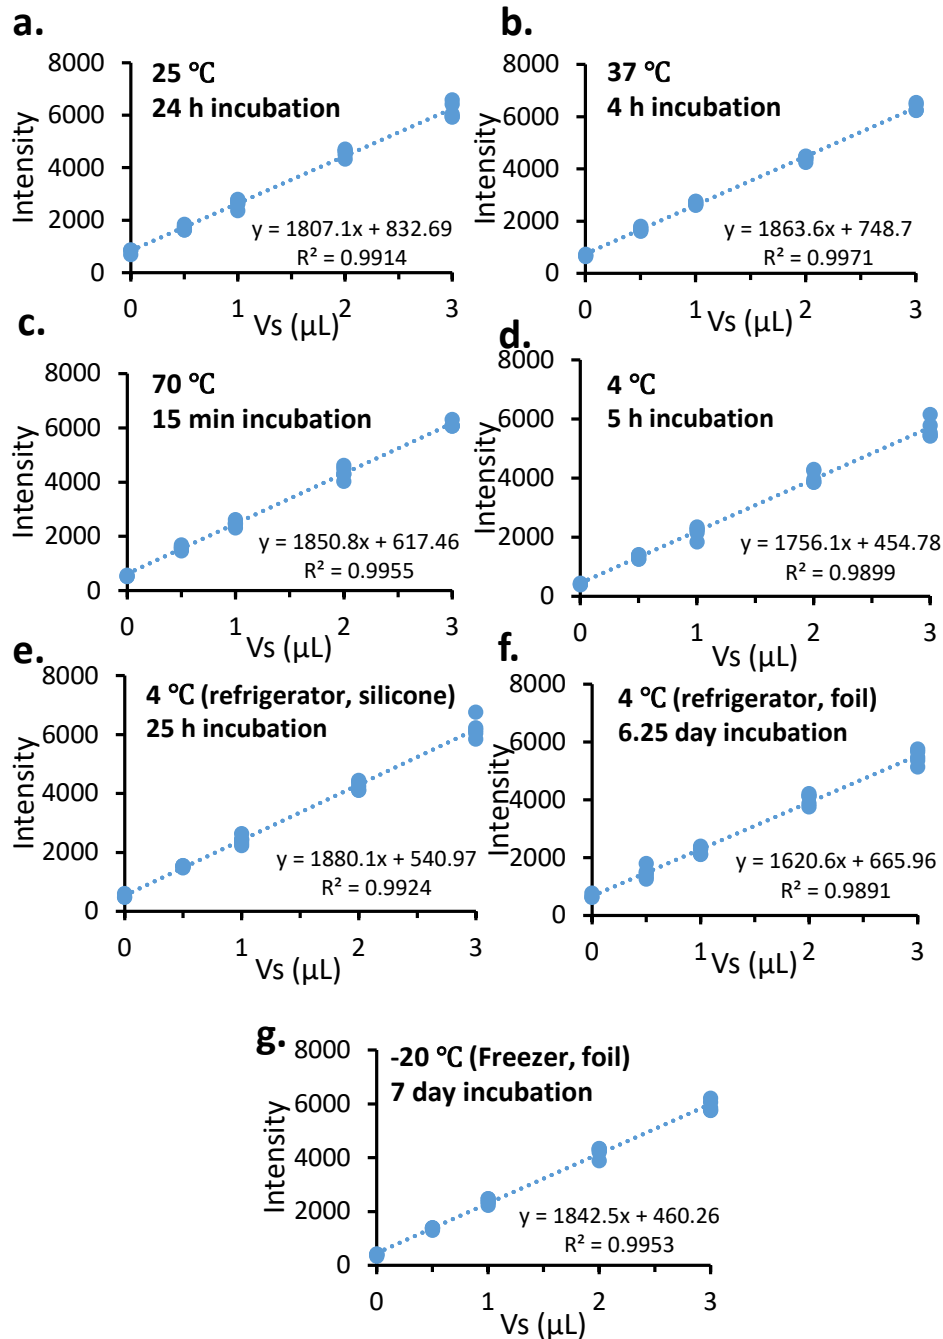

Figure S3: Determination of evaporation rates from well plates by standard addition at: (a-d) various temperatures using the OT-2 temperature control module and silicone sealing mat; (e) 4 °C in a refrigerator using a silicone sealing mat; (f) 4 °C in a refrigerator using an adhesive foil sealing mat; (g) -20 °C in a freezer using an adhesive foil sealing mat.

## Supporting information

Table S3: The number of cells sampled and corresponding peptide and protein IDs in each replicates of ~150 and ~500 HeLa cells. The cells were counted from the imaged taken using a microscope.

|         | Cell Counts | File Name        | MSFragger  |            | MaxQuant   |            |
|---------|-------------|------------------|------------|------------|------------|------------|
|         |             |                  | Peptide ID | Protein ID | Peptide ID | Protein ID |
|         | 141         | HeLa_150cell_I12 | 20441      | 2715       | 15722      | 2260       |
|         | 137         | HeLa_150cell_I16 | 22550      | 2791       | 17990      | 2482       |
|         | 160         | HeLa_150cell_I18 | 18936      | 2532       | 13471      | 2083       |
| Average | 146         |                  | 20642      | 2679       | 15728      | 2275       |
|         | 466         | HeLa_500cell_J5  | 36471      | 3307       | 23385      | 3446       |
|         | 520         | HeLa_500cell_K16 | 31416      | 3280       | 28885      | 3119       |
|         | 540         | HeLa_500cell_K8  | 35700      | 3455       | 27424      | 3314       |
| Average | 509         |                  | 34529      | 3347       | 26565      | 3293       |

## Supporting information

Table S4: The accuracy of FAC-sorting. Fluorescent beads were used with a target of 145.

|        | Replicates |     |     |     |     |     |     |     |     |     | Average | STDEV | CV(%) | Accuracy |
|--------|------------|-----|-----|-----|-----|-----|-----|-----|-----|-----|---------|-------|-------|----------|
| Counts | 133        | 125 | 126 | 130 | 134 | 138 | 135 | 127 | 124 | 121 | 129.3   | 5.5   | 4.3   | 89%      |



## Supporting information

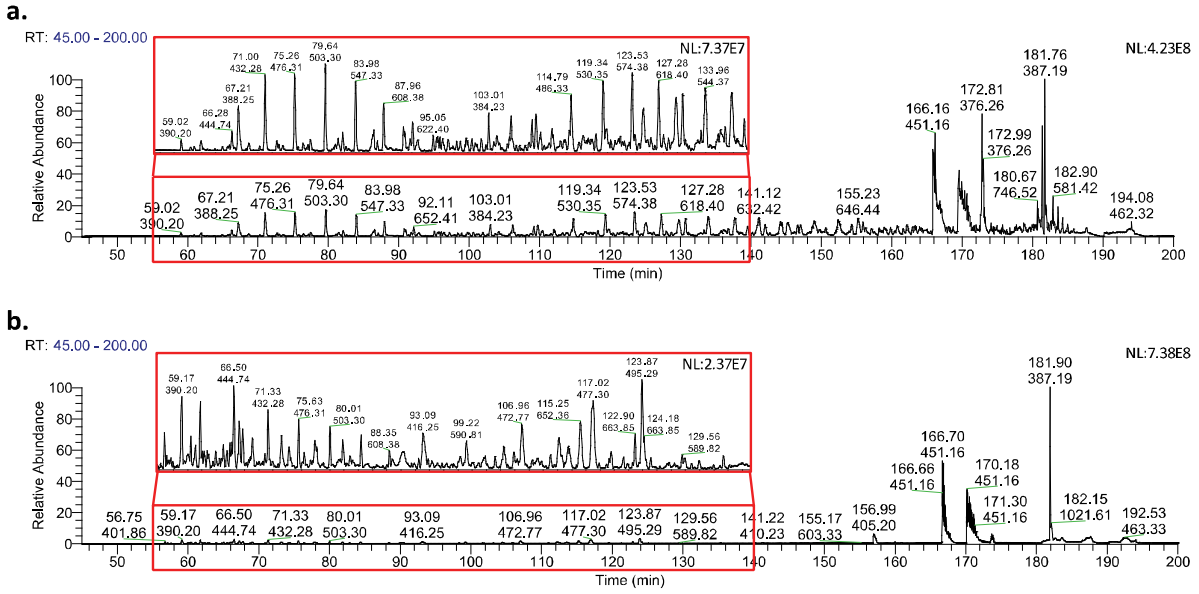

Figure S4: Chromatograms of 2 ng of HeLa protein digest standard. The HeLa digest solution was stored in (a) a fresh 384 well plate and (b) a pre-washed well plate.

Supporting information

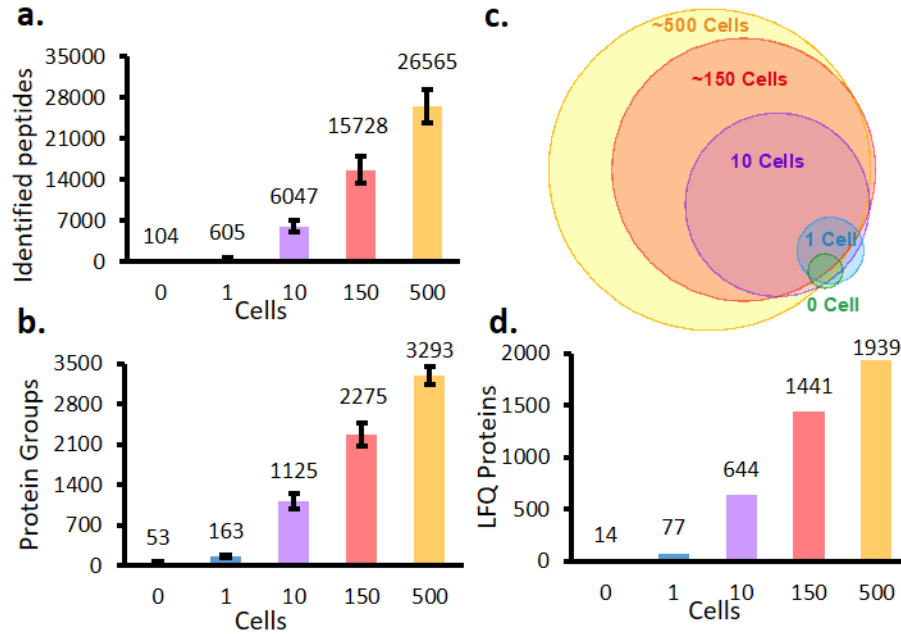

Figure S5: Number of peptides (a) and proteins (b) identified by MS/MS from 0 (supernatant from cell suspension), 1, 10, ~150, and ~500 HeLa cells using MaxQuant. (c) Overlap of protein groups identified in 2 of 3 replicates from various sample loadings. (d) Label free quantifiable proteins based on identification in 2 of 3 replicates and at least 2 peptides per protein group.

## Supporting information

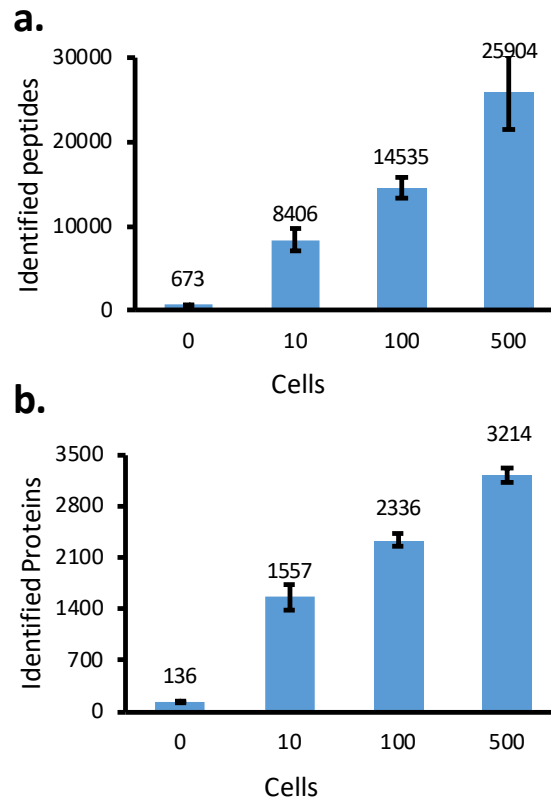

Figure S6: MS/MS identified peptides (a) and protein groups (d) from 0, 10, 100 and 500 HeLa cells isolated by FACS. For blanks, a cell-free droplet was sorted and dispensed into the well. Actual cell numbers are likely lower given the measured deposition efficiency of ~90% for this FACS system. Analysis were performed using MSFragger without MBR, and identified proteins are listed in Supplemental Table E1.

## Supporting information

Table S5: Gene set enrichment analysis using a cell-type classifier ProteomicsDB<sup>2</sup> of identified proteins from B and T lymphocytes.

| Cell Type              | Cell Line ID                          | Adjusted P-value |
|------------------------|---------------------------------------|------------------|
| Lymphoblastoid         | BTO:0000773 X129.126 HM11.GM18552     | 1.12E-80         |
| Hematopoietic MOLT-4   | BTO:0000873 P003361                   | 7.96E-72         |
| Breast HCC-202         | PDB:200003 HCC202 R2-1                | 9.93E-72         |
| Breast MCF-7           | BTO:0000093 HCC202 R2-2               | 8.83E-72         |
| Hematopoietic JURKAT   | BTO:0000661 Jurkat R2                 | 8.96E-65         |
| Hematopoietic PBMC     | BTO:0001008 81719202114 replicate01-4 | 8.18E-63         |
| Bone U2-OS             | BTO:0001938 CYTO BioRep1 heavy        | 2.88E-60         |
| Hematopoietic CCRF-CEM | BTO:0000736 P003197                   | 1.28E-57         |

## Supporting information

Table S6: Gene set enrichment using Gene Ontology Molecular Function (GOMF) annotations of identified proteins from B and T lymphocytes.

| Molecular function                                  | GO term      | Adjusted P-value |
|-----------------------------------------------------|--------------|------------------|
| RNA binding                                         | (GO:0003723) | 9.41E-148        |
| cadherin binding                                    | (GO:0045296) | 3.39E-52         |
| mRNA binding                                        | (GO:0003729) | 6.96E-19         |
| actin filament binding                              | (GO:0051015) | 4.79E-14         |
| translation factor activity, RNA binding            | (GO:0008135) | 2.10E-13         |
| actin binding                                       | (GO:0003779) | 4.92E-13         |
| nucleoside-triphosphatase activity                  | (GO:0017111) | 9.24E-13         |
| purine ribonucleoside triphosphate binding          | (GO:0035639) | 3.34E-12         |
| translation initiation factor activity              | (GO:0003743) | 4.10E-11         |
| NADH dehydrogenase (ubiquinone) activity            | (GO:0008137) | 2.65E-10         |
| NADH dehydrogenase (quinone) activity               | (GO:0050136) | 2.41E-10         |
| double-stranded RNA binding                         | (GO:0003725) | 6.38E-09         |
| protein homodimerization activity                   | (GO:0042803) | 6.08E-09         |
| purine ribonucleoside binding                       | (GO:0032550) | 6.82E-09         |
| GTP binding                                         | (GO:0005525) | 3.17E-08         |
| guanyl ribonucleotide binding                       | (GO:0032561) | 5.20E-08         |
| peptidase activity, acting on L-amino acid peptides | (GO:0070011) | 2.03E-07         |
| MHC class II protein complex binding                | (GO:0023026) | 1.99E-07         |
| exopeptidase activity                               | (GO:0008238) | 2.93E-07         |
| snRNA binding                                       | (GO:0017069) | 3.19E-07         |

## Supporting information

Table S7: Gene set enrichment using Wikipathways annotations of identified proteins from B and T lymphocytes.

| Pathway                                                              | Gene or Protein | Adjusted P-value |
|----------------------------------------------------------------------|-----------------|------------------|
| Cytoplasmic Ribosomal Proteins W                                     | P477            | 9.65E-67         |
| mRNA Processing W                                                    | P411            | 2.60E-38         |
| Proteasome Degradation W                                             | P183            | 5.41E-32         |
| Electron Transport Chain (OXPHOS system in mitochondria) W           | P111            | 1.92E-27         |
| Metabolic reprogramming in colon cancer WP                           | 4290            | 7.24E-25         |
| Translation Factors W                                                | P107            | 9.78E-17         |
| Parkin-Ubiquitin Proteasomal System pathway WP                       | 2359            | 3.18E-16         |
| Oxidative phosphorylation W                                          | P623            | 1.12E-15         |
| Nonalcoholic fatty liver disease WP                                  | 4396            | 9.05E-15         |
| TCA Cycle (aka Krebs or citric acid cycle)                           | WP78            | 2.27E-14         |
| Glycolysis and Gluconeogenesis W                                     | P534            | 2.50E-12         |
| VEGFA-VEGFR2 Signaling Pathway WP                                    | 3888            | 8.07E-12         |
| Pathogenic Escherichia coli infection WP                             | 2272            | 5.00E-11         |
| B Cell Receptor Signaling Pathway                                    | WP23            | 9.12E-11         |
| TCA Cycle and Deficiency of Pyruvate Dehydrogenase complex (PDHc) WP | 2453            | 9.63E-11         |
| Amino Acid metabolism WP                                             | 3925            | 1.15E-08         |
| Ciliary landscape WP                                                 | 4352            | 3.65E-08         |
| Ebola Virus Pathway on Host WP                                       | 4217            | 6.06E-08         |
| Regulation of Actin Cytoskeleton                                     | WP51            | 7.12E-08         |
| Prolactin Signaling Pathway WP                                       | 2037            | 9.14E-08         |

**Reference**

- (1) Opentrons. Opentrons Electronic Pipettes. <https://opentrons.com/publications/Opentrons-Pipette-White-Paper.pdf> (accessed Aug 7, 2020).
- (2) Schmidt, T.; Samaras, P.; Frejno, M.; Gessulat, S.; Barnert, M.; Kienegger, H.; Krcmar, H.; Schlegl, J.; Ehrlich, H. C.; Aiche, S.; et al. ProteomicsDB. *Nucleic Acids Res.* **2018**, *46* (D1), D1271–D1281. <https://doi.org/10.1093/nar/gkx1029>.
